# Supplementary material for: The synthesis and structure of [Zn(TEMPO)2]2 and [Zn(μ-H)(μ2-η1:η1-TEMPO)]6
Source: Royal Society of Chemistry journal article supplement (doi:10.1039/c4cc03256j), 2014-01-01
Supplement: c4cc03256j1.pdf [file c4cc03256j1.pdf]

**SUPPORTING INFORMATION**

**For**

**The Synthesis and Structure of  $[\text{Zn}(\text{TEMPO})_2]_2$  and  $[\text{Zn}(\mu\text{-H})(\mu^2\text{-}\eta^1:\eta^1\text{-TEMPO})]_6$**

Phillip Jochmann,<sup>a</sup> and Douglas W. Stephan<sup>a</sup>

**General Considerations** All manipulations were performed under an atmosphere of dry, oxygen-free N<sub>2</sub> by means of standard Schlenk or glovebox techniques (MBraun glovebox equipped with a -40 °C freezer) unless otherwise noted. C<sub>6</sub>D<sub>6</sub> and [D<sub>8</sub>]toluene were dried over Na/benzophenone ketyl, D<sub>5</sub>Pyridine was dried over CaH<sub>2</sub> and vacuum transferred before use. Other solvents were purified using an Innovative Technologies solvent purification system. [ZnCp\*<sub>2</sub>]<sup>[18]</sup> was prepared according to published protocols. TEMPO (Aldrich) and Carbenes ItBu (TCI), IDipp (Aldrich) and IMes (Aldrich) were used as received. NMR spectra were recorded on Bruker Avance 400 MHz, an Agilent DD2 500, or an Agilent DD2 600Hz spectrometer. Chemical shifts were referenced internally using the residual solvent resonances and reported relative to tetramethylsilane. X-ray crystallography (Bruker Kappa Apex II), FTIR (KBr, Perkin-Elmer Spectrum One) and elemental analysis (Perkin-Elmer CHN Analyzer) were performed in house.

**Zn(TEMPO)<sub>2</sub>.** A vial was charged with ZnCp\*<sub>2</sub> (52 mg, 0.155 mmol) and TEMPO (0.333 mmol) and Et<sub>2</sub>O (2 mL) was added. All solids dissolved to give a pale yellow solution from which the product crystallizes within minutes. To complete crystallization the mixture was kept in a freezer over night. The colorless crystals were isolated by decantation, washed with pentane and dried in vacuo (53 mg, 0.140 mmol, 90%). <sup>1</sup>H-NMR (400 MHz, [D<sub>5</sub>]Pyridine, 25 °C): δ = 1.63 (br s, 8H, β-CH<sub>2</sub>), 1.45 (br s, 28H, γ-CH<sub>2</sub> and Me); <sup>13</sup>C-NMR (100 MHz, [D<sub>5</sub>]Pyridine, 25 °C): δ = 59.3 (C), 41.4 (β-CH<sub>2</sub>), 34.0 (br, Me), 18.9 (γ-CH<sub>2</sub>); elemental analysis calcd for C<sub>18</sub>H<sub>36</sub>N<sub>2</sub>O<sub>2</sub>Zn: C 57.21, H 9.60, N 7.41; found: C 56.83, H 8.91, N 7.43.

**[Zn(μ-H)(μ<sup>2</sup>-η<sup>1</sup>-η<sup>1</sup>-TEMPO)]<sub>6</sub>.** A suspension of Zn(TEMPO)<sub>2</sub> (24 mg, 0.64 mmol) in benzene (4 mL) was exposed to H<sub>2</sub> (100 atm) for 72 h. The resulting colorless crystals were separated from the faint red solution by decantation, washed with pentane and dried in vacuo (13 mg, 0.058 mmol, 91%). <sup>1</sup>H-NMR (400 MHz, C<sub>6</sub>D<sub>6</sub>, 25 °C): δ = 3.63 (ZnH), 1.41 (m, 4H, β-CH<sub>2</sub>), 1.31 (br, 2H, γ-CH<sub>2</sub>), 1.15 (s, 12H, Me); <sup>13</sup>C-NMR (100 MHz, C<sub>6</sub>D<sub>6</sub>, 25 °C): δ = 58.5 (C), 39.8 (β-CH<sub>2</sub>), 25.5 (br, Me), 17.4 (γ-CH<sub>2</sub>), repeated attempts to obtain EA were unsuccessful presumably due to the sensitivity of this species



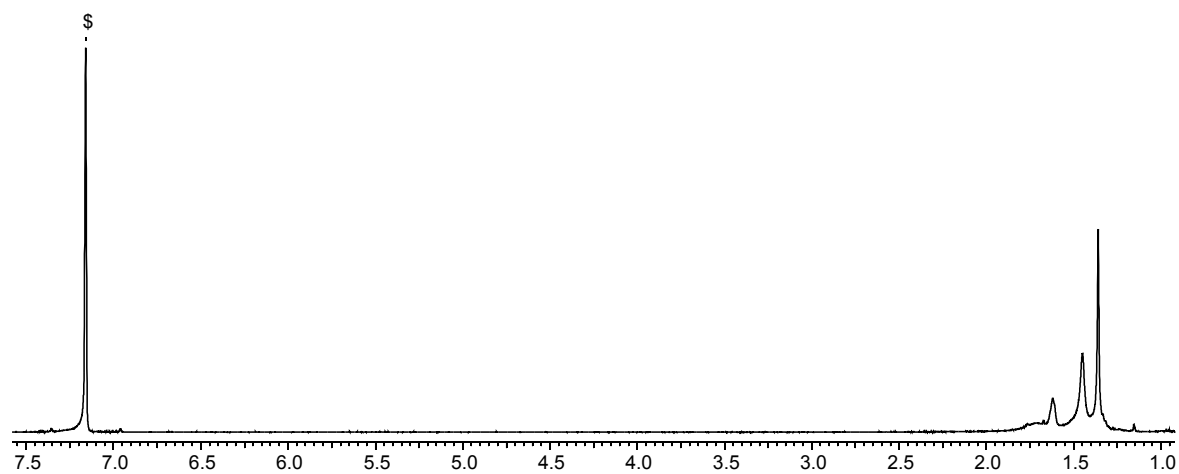

**Figure 1.**  $^1\text{H}$  NMR spectrum of  $\text{Zn}(\text{TEMPO})_2$  in  $\text{C}_6\text{D}_5$  (\$) at 25 °C.

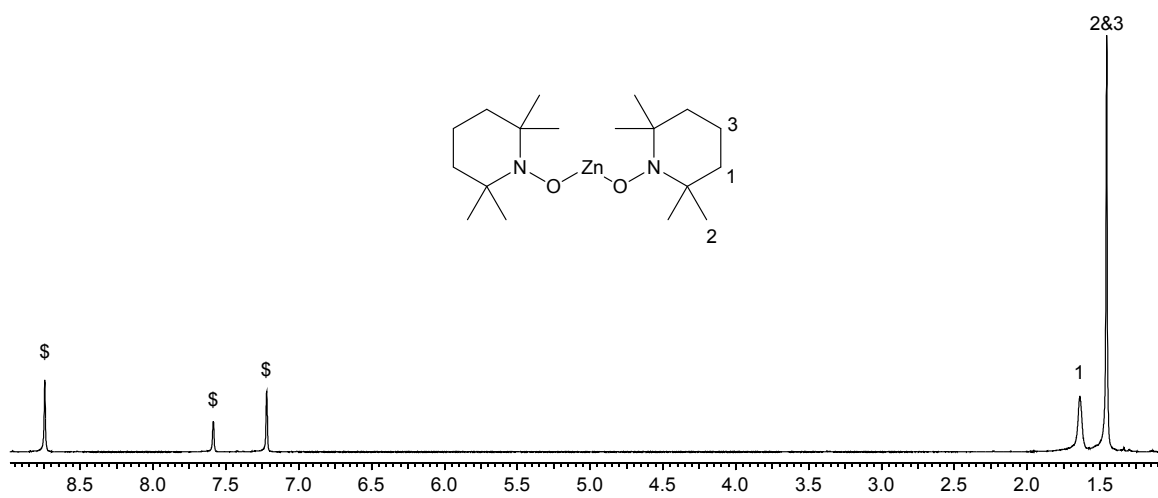

**Figure 2.**  $^1\text{H}$  NMR spectrum of  $\text{Zn}(\text{TEMPO})_2$  in  $[\text{D}_5]\text{pyridine}$  (\$) at 25 °C.

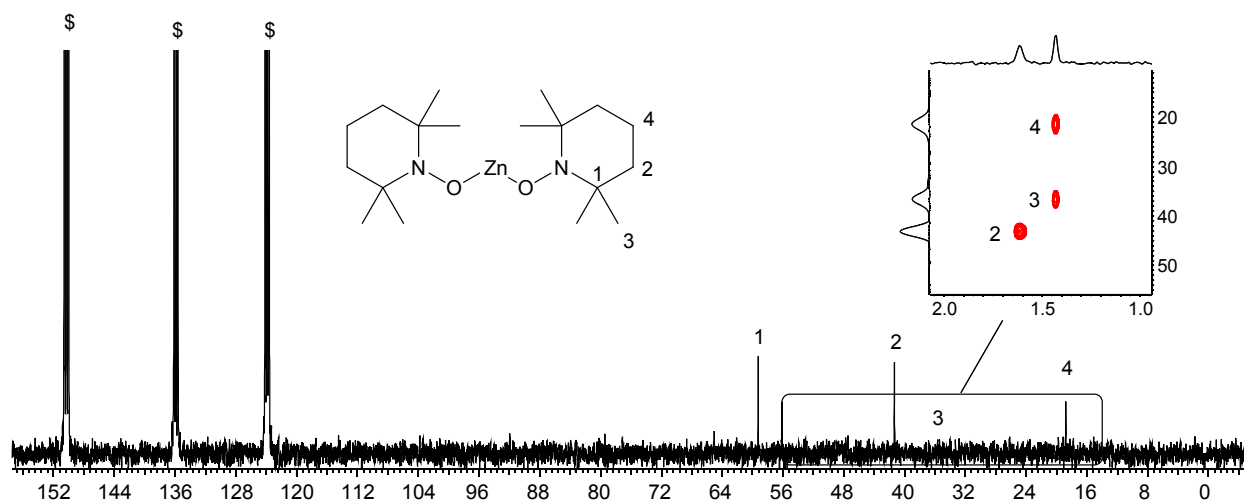

**Figure 3.**  $^{13}\text{C}$  NMR spectrum of  $\text{Zn}(\text{TEMPO})_2$  in  $[\text{D}_5]\text{pyridine}$  (\$) at 25 °C. Partial HSQC spectrum depicted for assignment of methyl groups.

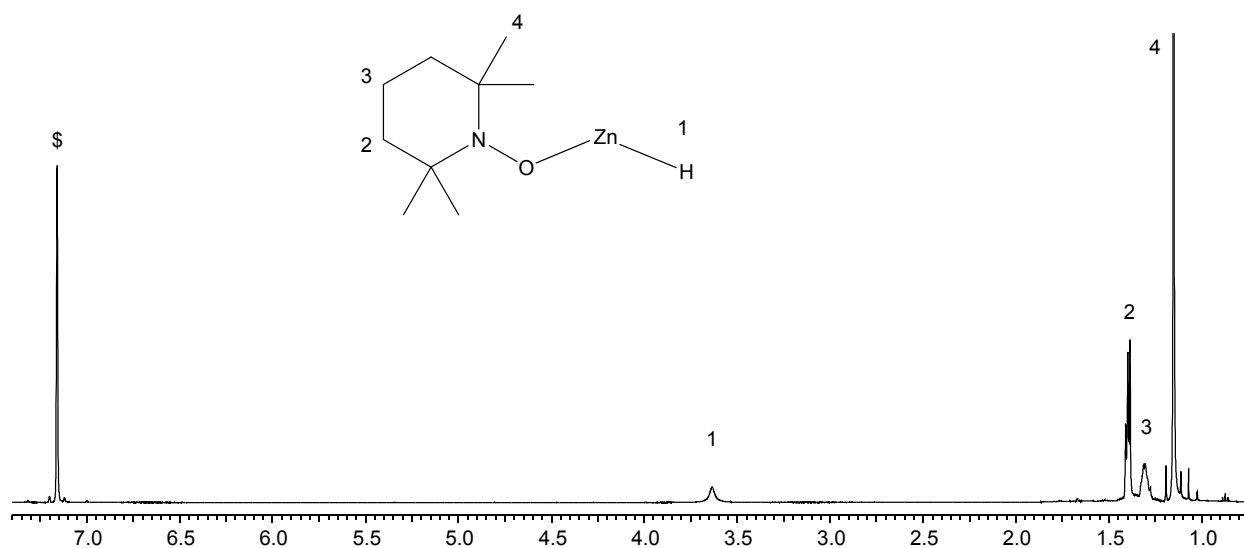

**Figure 4.**  $^1\text{H}$  NMR spectrum of  $\text{HZn}(\text{TEMPO})$  in  $\text{C}_6\text{D}_5$  ( $\text{\$}$ ) at  $25^\circ\text{C}$ .

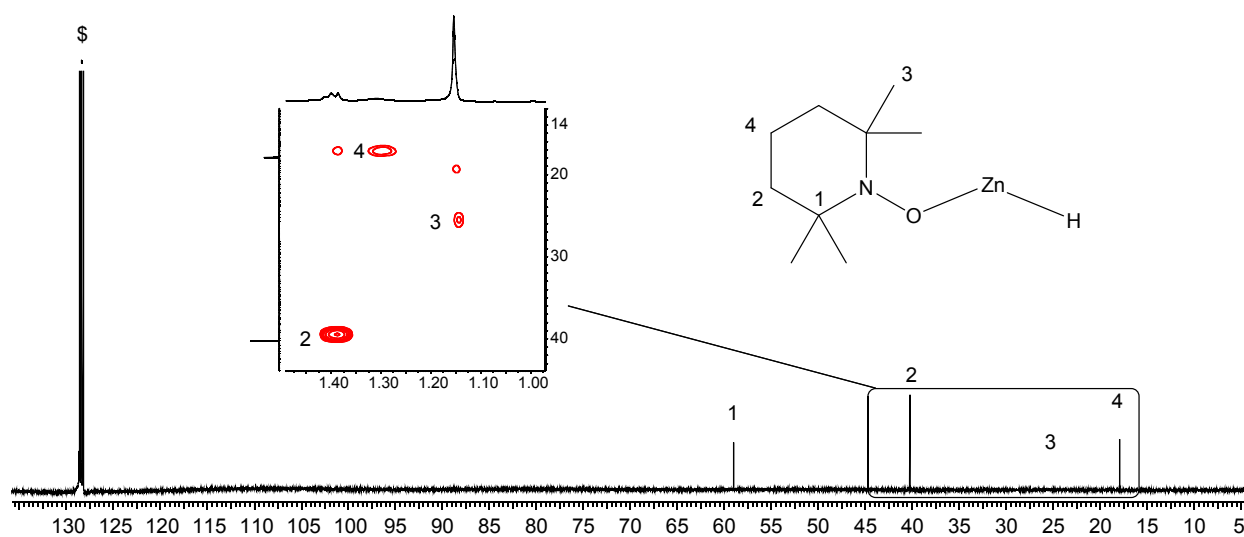

**Figure 5.**  $^{13}\text{C}$  NMR spectrum of  $\text{HZn}(\text{TEMPO})$  in  $\text{C}_6\text{D}_5$  ( $\text{\$}$ ) at  $25^\circ\text{C}$ . Partial HSQC spectrum depicted for assignment of methyl groups.

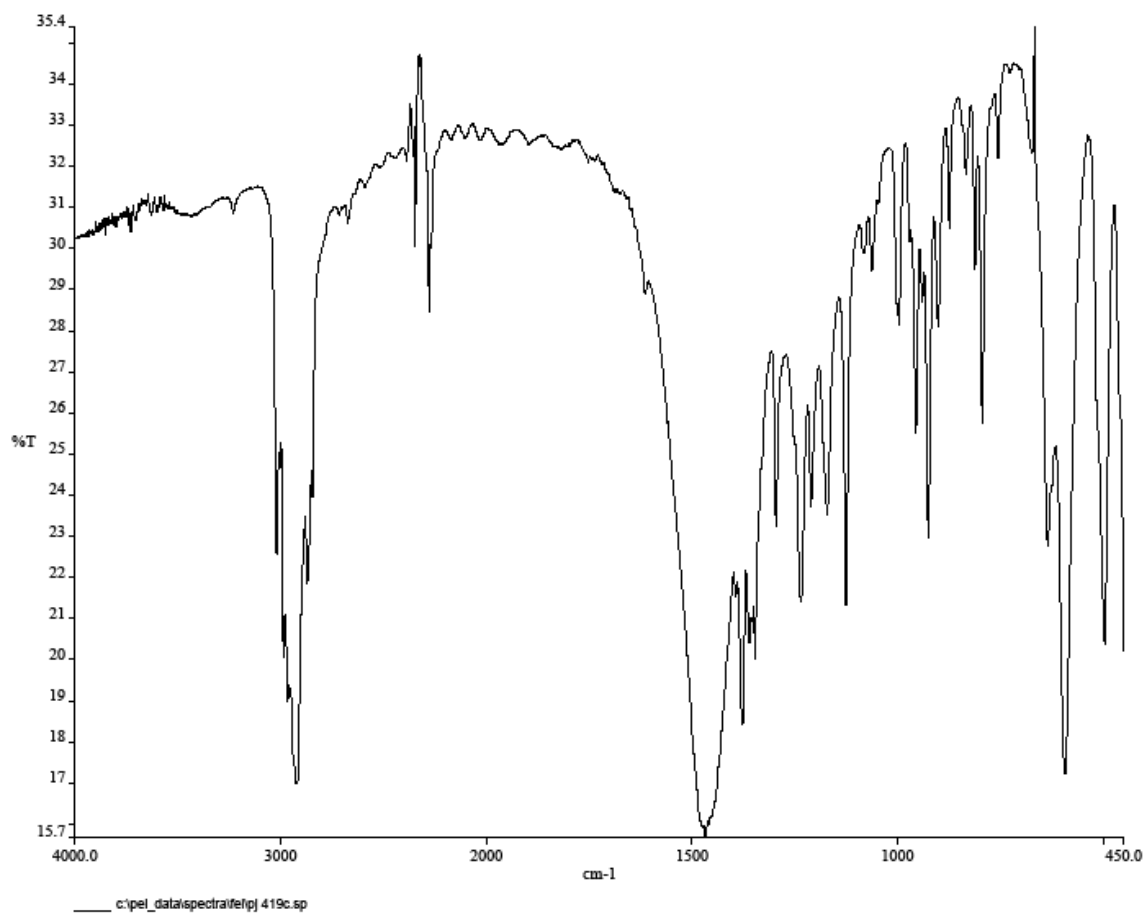

**Figure 5.** FTIR spectrum of HZn(TEMPO) (KBr disc).
